# Supplementary material for: PARP7 Suppresses Radiation-induced Necroptosis and Abscopal Immunity
Source: Research Square preprint supplement (doi:10.21203/rs.3.rs-7881707/v1), 2025-11-07
Supplement: Supplementary file 1 [file 3d40c8bae8f949dcf78d59e7.docx]

**Supplementary Information**

**Figure S1:** Murine tumor models assessing the abscopal response.

**Figure S2:** Spatial transcriptomic analysis of the abscopal response.

**Figure S3:** Comprehensive spectral flow cytometry gating strategy for immune profiling of murine TNBC tumors.

**Figure S4:** Spectral flow cytometry analysis of immune cells on day 10 of treatment in abscopal and non-abscopal murine models.

**Figure S5:** *In vitro* analysis of mechanisms to enhance the abscopal response.

**Figure S6:** The addition of PARP7i to RT+ICI enhances the abscopal response *in vivo*.

**Figure S7:** Investigating enhancement of the abscopal response through the addition of Olaparib.

**Figure S8:** Investigating the effects of ZBP1 loss on the abscopal response.

**Figure S9:** Generating a human PARP7 signature gene set.

**Table1:** Materials and dilutions of antibodies used in spectral flow cytometry.

**Supplementary Figure and Table Legends:**

**Figure S1: Murine tumor models assessing the abscopal response.** (a) Number of single nucleotide variants (SNVs) identified in the 2250L, 2208L, 2336R, and 2225L tumor models from LENS analysis (n=3/tumor model). (b) Predicted number of neoantigens expressed per tumor model 2250L, 2208L, 2336R, and 2225L from LENS analysis (n=3/tumor model). (c) Delta area under the curve analysis (ΔAUC) of dual ICI compared to untreated controls for (i) 2250L, (ii) 2208L, (iii) 2336R, and (iv) 2225L tumors. Timepoints for comparison were defined as the day on which 50% of control mice reached endpoint tumor burden. (d) Static tumor volumes at day 12 for (i) 2250L and (iii) 2336R, and day 13 for (ii) 2208L. Fisher’s LSD test, *p<0.05, **p<0.01, ***p<0.001, ****p<0.0001. (e) Tumor growth curves plotted as tumor volume over days on treatment for each model: (i) 2250L, (ii) 2208L, (iii) 2336R, and (iv) 2225L. (f) Individual tumor growth for each tumor model and treatment, with mean tumor volume shown in black. (g) Kaplan-Meier survival analysis for all treatment groups for (i) 2250L, (ii) 2208L, (iii) 2336R, and (iv) 2225L. Untreated in black, ICI in gray, RT only in blue, RT+ICI in red.

**Figure S2: Spatial transcriptomic analysis of the abscopal response.** Syngeneic p53-null BALB/c murine TNBC models, including abscopal-competent 2250L or non-abscopal competent 2336R tumors, were harvested on day 10 of treatment and fixed for spatial transcriptomics. Tumors were arranged in a tissue microarray, stained for PanCK and CD45, and tumor- and immune-enriched areas of interest (AOI) were collected and profiled using the NanoString GeoMx Digital Spatial Profiler (DSP). (a) PanCK+ AOI nuclei counts quantified by GeoMx DSP. (b) CD45+ AOI nuclei counts quantified by GeoMx DSP. (c) Representative image showing PanCK (green) and CD45 (red) staining and corresponding region of interest (ROI)/AOI selection from the GeoMx DSP. Merged overlay highlights collected tissues with CD45+ regions in yellow and PanCK+ regions in blue. Scale bar = 100 µm. (d) Three-dimensional principal component analysis (3D-PCA) plot of tumor-enriched (PanCK+) segments (upper panel) and immune-enriched (CD45+) segments (lower panel). (e) Heatmap of immune-enriched segment expression of genes from the Gene Ontology: Biological Process (GO:BP) term “T cell activation.” (f) Heatmap of immune-enriched segment expression of genes from the GO:BP term “macrophage activation.” (g) Gene set enrichment analysis (GSEA) of GO terms from tumor-enriched segments comparing 2250L RT+ICI–targeted vs 2336R RT+ICI–targeted. (h) *Zbp1* expression (Q3-normalized counts) in tumor-enriched segments. Unpaired t-test, * p<0.05, **p<0.01, ***p<0.001, ****p<0.0001.

**Figure S3: Comprehensive spectral flow cytometry gating strategy for immune profiling of murine TNBC tumors.** Cells were stained with a 27-marker immune profiling panel and analyzed on Cytek Aurora. Header titles above each flow plot indicate the parent population, and the subpopulations are labelled within each plot. Data were sequentially gated on singlets (FSC-H vs FSC-A) and live CD45⁺ to identify major myeloid and lymphoid populations. Within CD45⁺ cells, Ly6G and CD11b markers were used to distinguish Ly6G⁺CD11b⁺ neutrophils from Ly6G⁻CD11b⁺ myeloid populations. Among Ly6G⁻CD11b⁺ cells, F4/80⁺ macrophages were identified and divided into antigen-presenting macrophages (MHCII⁺PD1-) and exhausted tumor-associated like macrophages (MHCII-PD1+). Within the F4/80- population, myeloid-derived suppressor cells (MDSCs) were defined as MHCII⁻Ly6G-Ly6C⁺, and dendritic cells (DCs) were defined as MHCII⁺CD11c⁺, with CD80+ expression indicating activated DCs. For lymphoid gating, Ly6G+ and CD11b+ cells were excluded, and the remaining population was gated on CD19⁺CD3⁻ to identify B cells. Mature B cells were defined as B220⁺CD19⁺, and plasma cells as CD138⁺CD19-. T cells (CD3⁺CD19⁻) were subdivided into CD4⁺ and CD8⁺ lineages. Differentiation states were defined as effector T cells (Teff; CD44⁺CD62L⁻), naive (CD44-CD62L+), central-memory T cells (Tcm; CD44⁺CD62L⁺). Teff cells were identified as recently activated T cells (CD69⁺CD103⁻) or tissue-resident memory (Trm; CD69⁺CD103⁺) subsets. Functional and proliferative states were determined based on PD-1, TIM3, Ki-67, CD127, or KLRG1 expression. Among Teff cells, exhaustion states were classified as exhausted (PD-1⁺TIM3-) or highly exhausted (PD-1⁺TIM3+). Proliferative activity assessed using Ki67 and PD-1, classified as proliferative (Ki-67+PD-1⁺), reinvigorated exhausted (Ki-67+ PD-1-), or terminally exhausted (Ki-67-PD-1⁺). Effector cells were further categorized as short-lived effector cells (SLECs; CD127⁻KLRG1⁺) and memory-precursor effector cells (MPECs; CD127⁺KLRG1⁻). Regulatory T cells (Tregs) were identified as FoxP3⁺CD127- and further stratified into effector Tregs (CD44⁺CD62L⁻) and recently activated effector Tregs (CD69⁺CD103⁻). Gamma delta (γδ⁺) T cells were identified as CD3⁺CD4⁻CD8⁻TCRγδ⁺.

**Figure S4: Spectral flow cytometry analysis of immune cells on day 10 of treatment in abscopal and non-abscopal murine models.** High parameter flow cytometry of abscopal 2250L and non-abscopal 2336R tumors from p53-null BALB/c mice harvested on day 10 of treatment and analyzed using OMIQ. (a-b) Multi-dimensional volcano plot showing one comparison on the X-axis, and another comparison on the Y-axis, plotted by -log10(FDR). Populations significant in only the X-axis comparison shown in green, populations significant in only the Y-axis comparison shown in black, populations significant in both the X-axis comparison and Y-axis comparison shown in red, not significant populations shown in gray. Mixed-effects models. (a) 2250L RT+ICI–targeted tumor compared to 2250L ICI on Y-axis, 2250L RT+ICI–targeted tumor compared to 2336R RT+ICI–targeted tumor on X-axis. (b) 2250L RT+ICI–contralateral tumor compared to 2250L ICI on Y-axis, 2250L RT+ICI–contralateral tumor compared to 2336R RT+ICI–contralateral tumor on X-axis. (c-k) Immune cell subpopulations graphed by tumor type (2250L and 2336R) and treatment (ICI in gray, RT+ICI–targeted in blue, and RT+ICI–contralateral in red). Tumor specific comparisons shown by # for 2250L and ^ for 2336R. Comparisons between tumor types shown in brackets. Mixed-effects models, * p<0.05, **p<0.01, ***p<0.001, ****p<0.0001.

**Figure S5: *In vitro* analysis of mechanisms to enhance the abscopal response.** (a) Unsupervised hierarchical clustering of cell line models of 2250L, 2208L, 2336R, and 2225L tumors depicting high-variance normalized gene expression values 48 h after 8 Gy irradiation (n=3/cell line). (b) Heatmap of PARP family gene expression in abscopal (2250L, 2208L) and non-abscopal (2336R, 2225L) murine models. (c) Fold changein *Ifnb1* mRNA expression in 2250L cells 48 h after treatments: untreated, olaparib (PARP1/2 inhibitor), Xevinapant (inhibitor of apoptosis protein (IAP) inhibitor), ADARi (RNA-editing enzyme inhibitor), and PARP7i. Fisher’s LSD test, * p<0.05, **p<0.01, ***p<0.001, ****p<0.0001. (d-f) Fold change in expression of interferon-stimulated genes and chemokines across abscopal and non-abscopal models treated ± RT and ± PARP7i. Fisher’s LSD test, * p<0.05, **p<0.01, ***p<0.001, ****p<0.0001. (g) Western blot of long and short ZBP1 isoforms and phospho-MLKL (pMLKL) after indicated treatments (± RT and ± PARP7i) Actin served as the loading control. (h) Immunofluorescence staining of 2250L cells by treatment; DAPI (blue) and Z-form nucleic acids (Z-NAs, green). Mean Z-NA fluorescence intensity analyzed using Fisher’s LSD test, * p<0.05, **p<0.01, ***p<0.001, ****p<0.0001.

**Figure S6: The addition of PARP7i to RT+ICI enhances the abscopal response *in vivo*.** p53-null BALB/c mice implanted with abscopal-competent (2250L, 2208L) or non-abscopal (2336R) tumors were treated with RT+ICI or RT+ICI+PARP7i, with radiation delivered to the targeted tumor. Tumor volumes were monitored overtime, and a cohort of 2250L bearing mice were harvested on day 10 of treatment for spectral flow cytometry. (a) Static tumor volumes at day 13 for (i) 2250L and (iii) 2336R, and day 12 for (ii) 2208L. Fisher’s LSD test, *p<0.05, **p<0.01, ***p<0.001, ****p<0.0001. (b) Tumor volume growth curves plotted as tumor volume over days on treatment for each model: (i) 2250L, (ii) 2208L, and (iii) 2336R. (c) Individual tumor growth trajectories for each tumor model and treatment, with mean tumor volume shown in black. (d-n) Spectral flow cytometry. (d) Multi-dimensional volcano plot showing 2250L RT+ICI+PARP7i–contralateral vs untreated comparison on the X-axis, and 2250L RT+ICI+PARP7i–contralateral vs 2250L RT+ICI–contralateral comparison on the Y-axis, plotted by -log10(FDR). Populations significant only along the X-axis are shown in green, only along the Y-axis shown in black, significant in both in red, and not significant in gray. Mixed-effects models. (e-n) 2250L immune cell subpopulations quantified by spectral flow and plotted by treatment (untreated in gray, targeted in blue, and contralateral in red). Comparisons with untreated denoted by #, comparisons between treatments shown in brackets. Mixed-effects models, * p<0.05, **p<0.01, ***p<0.001, ****p<0.0001.

**Figure S7: Investigating enhancement of the abscopal response through the addition of Olaparib.** Abscopal-competent 2250L tumorsin *p53*-null BALB/c mice were treated with RT+ICI or RT+ICI+Olaparib, with radiation delivered to the targeted tumor. Tumor volumes were monitored over time, and treatment effects on tumor growth, abscopal response, and survival were assessed. (a) 2250L tumor volume at day 10. Fisher’s LSD test, *p<0.05, **p<0.01, ***p<0.001, ****p<0.0001. (b) 2250L tumor volume at day 12. Fisher’s LSD test, *p<0.05, **p<0.01, ***p<0.001, ****p<0.0001. (c) Tumor growth curves showing tumor volume over days on treatment. (d) ΔAUC of the contralateral tumors in RT+ICI vs RT+ICI+Olaparib as determined by unpaired t-test, p= 0.0627. Timepoints for comparison were defined as the day when 50% of control mice reached endpoint tumor burden. (e) ΔAUC of the contralateral tumors of RT+ICI vs RT+ICI+Olaparib (Chow) as determined by unpaired t-test, p= 0.2935. Comparisons made using the same timepoint defined in (d). (f) Kaplan-Meier survival of mice across treatments. (g) Individual tumor growth trajectories by treatment, with mean tumor volume shown in black.

**Figure S8: Investigating the effects of ZBP1 loss on the abscopal response.** 2250L wild-type (WT) or ZBP1 knockout (KO) tumors in p53-null BALB/c mice were untreated or treated with RT+ICI+PARP7i, with radiation delivered to the targeted tumor. Tumor growth over time and immune profiling via spectral flow cytometry were assessed. (a) Treatment day 12 tumor volumes of 2250L WT and 2250L ZBP1 KO tumors. Fisher’s LSD test, *p<0.05, **p<0.01, ***p<0.001, ****p<0.0001. (b) Tumor growth curves showing tumor volume over days on treatment with mean tumor volume shown in black. (c-d) Spectral flow cytometry analysis of immune cell populations from treatment day 10 tumors, analyzed in OMIQ. (c) Volcano plot comparing immune cell populations in WT RT+ICI+PARP7i–contralateral vs ZBP1 KO RT+ICI+PARP7i–contralateral tumors. (d-k) Immune cell populations plotted by treatment (untreated in gray, RT+ICI+PARP7i–targeted in blue, and RT+ICI+PARP7i–contralateral in red). Comparisons with 2250L WT untreated tumors denoted by #, comparisons with 2250L ZBP1 KO untreated tumors denoted by ^; comparisons between tumor models shown in brackets. Mixed-effects models, * p<0.05, **p<0.01, ***p<0.001, ****p<0.0001.

**Figure S9:** **Generating a human PARP7 signature gene set.** (a) k-Top Scoring Pairs gene signature comprising 30 gene pairs. In most comparisons, expression of gene2 > gene1 in the PARP7-low group. (b) Kaplan-Meier survival analysis of patients with primary basal-like TNBC, stratified by PARP7 signature score using pretreatment RNA-seq samples from the TCGA cohort (p=0.54). (c) PARP7 signature groups in the TNBC basal-like TNBC dataset compared using Hallmark gene sets. Signature scores for each sample were calculated as the median expression of each gene set and compared using Mann-Whitney U-tests with post-hoc Bonferroni correction. For significant gene sets (adjusted p-value<0.05), color denotes the direction of the comparison. (d) PARP7 signature groups in the TCGA basal-like TNBC dataset compared using a curated set of immune signatures. Significance determined by Mann-Whitney U-tests with Bonferroni correction and conservative threshold of adjusted p<0.0001. (e) PARP7 signature groups in the METABRIC hormone receptor positive (HR+) dataset compared using a curated set of immune signatures. Significance determined by Mann-Whitney U-tests with Bonferroni correction and conservative threshold of adjusted p<0.0001.

**Table1: Materials and dilutions of antibodies used in spectral flow cytometry for murine models.**
